# Supplementary material for: Nicotine exacerbates intervertebral disc degeneration via NF-κB/MAPK-dependent inflammatory activation and cellular senescence
Source: Research Square preprint supplement (doi:10.21203/rs.3.rs-6586785/v1), 2025-05-21

**Supplementary Fig. 1 Customized rat smoke exposure system.** The apparatus includes real-time monitoring of CO/O2/pm2.5, ventilation control, and data logging.


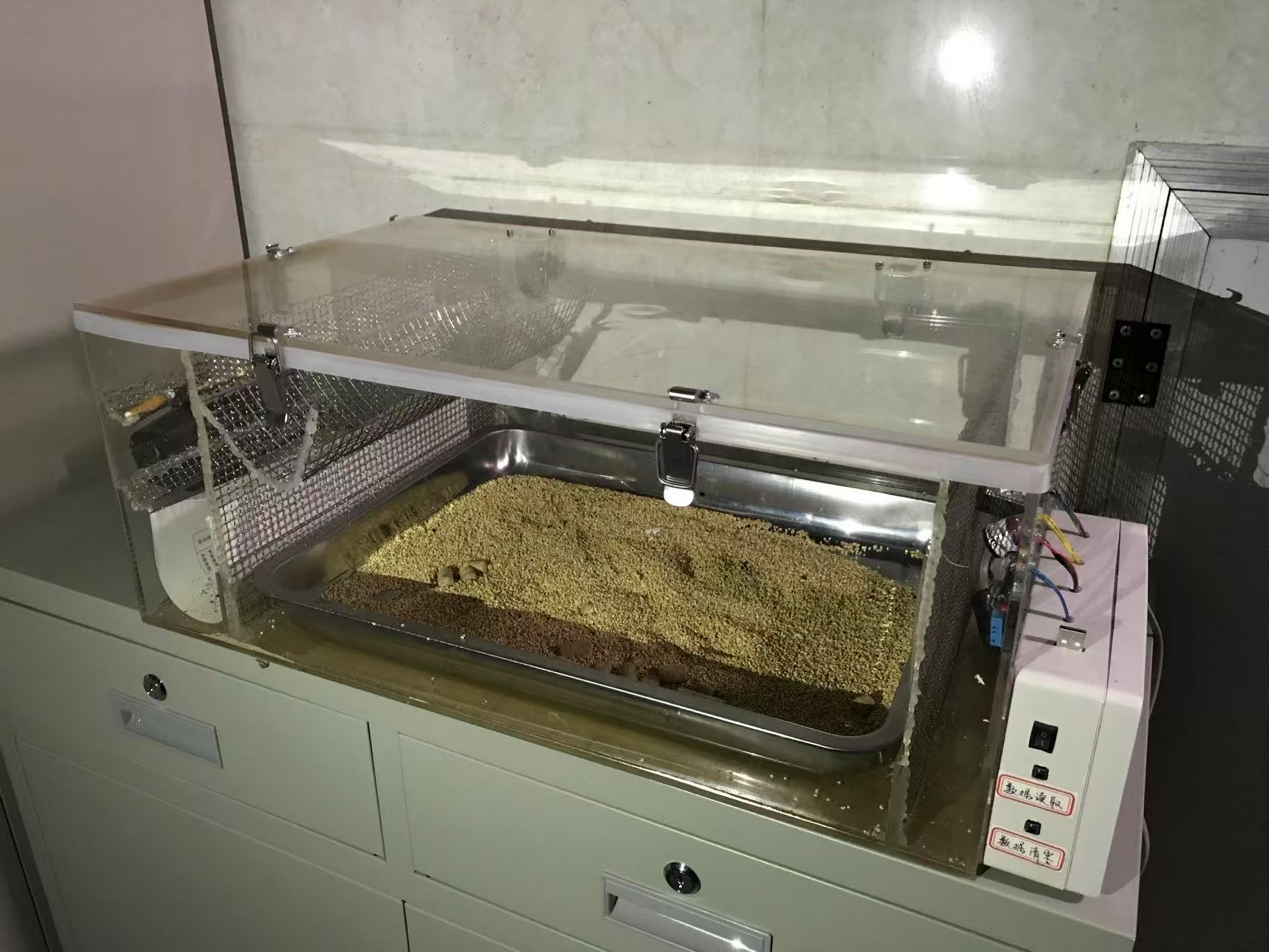

Supplement: Supplementary file 1 [file 244f3f773c69aa15ee445ae7.docx]
