# Supplementary material for: Nicotine exacerbates intervertebral disc degeneration via NF-κB/MAPK-dependent inflammatory activation and cellular senescence
Source: Research Square preprint supplement (doi:10.21203/rs.3.rs-6586785/v1), 2025-05-21
Supplement: Supplementary file 2 [file c93f5d43e1dd577499817a45.docx]

**Supplementary Table 1 Primers Used in the Present Study**

| Gene | Sense | Anti-sense |
| --- | --- | --- |
| Aggrecan | TGGTGAAAGGCATCGTGTTCC | GGGAGTGTGGATGGGGTATCT |
| Collagen II | CACTCAAGTCCCTCAACAACCAG | GGGGTCAATCCAGTAGTCTCCAC |
| GAPDH | GGACAAAGGATACAACAGGGACC | GCATCAAAGGACAAAGCAGGA |
| MMP-13 | AGACCCCAACCCTAAACATCC | AAAACAGCTCCGCATCAACC |
| IL-1β | TTCCCTGCCCACAGACCTT | CTTTTTTGCTGTGAGTCCCGG |
